# Supplementary material for: Prewhitening and normalization help detect a strong cross-correlation between daily wastewater SARS-CoV-2 RNA abundance and COVID-19 cases in a community
Source: Royal Society of Chemistry journal article supplement (doi:10.1039/d2ew00951j), 2023-01-01
Supplement: d2ew00951j1.pdf [file d2ew00951j1.pdf]

1  
2  
3  
4  
5  
6  
7  
8  
9  
10  
11  
12

**Supplementary information for**  
**Prewhitening and Normalization Help Detect a Strong Cross-Correlation Between**  
**Daily Wastewater SARS-CoV-2 RNA Abundance and COVID-19 Cases in a**  
**Community**

Min Ki Jeon <sup>1</sup>, Bo Li <sup>1</sup>, Doris Yoong Wen Di <sup>1</sup>, and Tao Yan <sup>1\*</sup>

<sup>1</sup> Department of Civil and Environmental Engineering, University of Hawaii at Manoa,  
Honolulu, HI 96822

13 **Table S1.** Primers and probes used for qPCR assays for detection of SARS-CoV-2 genes and fecal viral indicators from wastewater

| Target gene                      | Primer/probe   | Sequence (5' → 3')                             | Amplicon size (bp) | Concentration (nM) | Reference |
|----------------------------------|----------------|------------------------------------------------|--------------------|--------------------|-----------|
| SARS-CoV-2 N1                    | 2019-nCoV_N1-F | GAC CCC AAA ATC AGC GAA AT                     | 72                 | 150                | (1)       |
|                                  | 2019-nCoV_N1-R | TCT GGT TAC TGC CAG TTG AAT CTG                |                    | 150                |           |
|                                  | 2019-nCoV_N1-P | FAM-ACC CCG CAT TAC GTT TGG TGG ACC-BHQ1       |                    | 50                 |           |
| SARS-CoV-2 N2                    | 2019-nCoV_N1-F | TTA CAA ACA TTG GCC GCA AA                     | 67                 | 150                |           |
|                                  | 2019-nCoV_N1-R | GCG CGA CAT TCC GAA GAA                        |                    | 150                |           |
|                                  | 2019-nCoV_N1-P | FAM-ACA ATT TGC CCC CAG CGC TTC AG-BHQ1        |                    | 50                 |           |
| SARS-CoV-2 E                     | E_Sarbeco_F    | ACA GGT ACG TTA ATA GTT AAT AGC GT             | 113                | 150                | (2)       |
|                                  | E_Sarbeco_R    | ATA TTG CAG CAG TAC GCA CAC A                  |                    | 150                |           |
|                                  | E_Sarbeco_P    | FAM-ACA CTA GCC ATC CTT ACT GCG CTT CG-BHQ1    |                    | 50                 |           |
| F+ RNA coliphages Group II (G2)  | G2_F           | TTA CTG TCG TTC CTG TTA GCA ATG                | 104                | 400                | (3)       |
|                                  | G2_R           | CRC CTG ACG CAC GAT AAC T                      |                    | 400                |           |
|                                  | G2_P           | FAM-ACG GCG TCG CTG AGT GGC TTT C-BHQ1         |                    | 200                |           |
| F+ RNA coliphages Group III (G3) | G3_F           | TAA ATC CCA CYA ACG GYG TTG C                  | 108                | 400                |           |
|                                  | G3_R           | TTI CGA TTR CGI GAA GGC TG                     |                    | 400                |           |
|                                  | G3_P1          | FAM-TGG AGA AGC GTG TTA CCG TTT-BHQ1           |                    | 200                |           |
|                                  | G3_P2          | FAM-TGG AGA AGC GTG TYA CAA TTT CTG TRT C-BHQ1 |                    | 200                |           |

|                                        |         |                                                   |    |     |     |
|----------------------------------------|---------|---------------------------------------------------|----|-----|-----|
| Pepper mild mottle virus (PMMoV)       | PMMoV-F | GAG TGG TTT GAC CTT AAC GTT GA                    | 68 | 200 | (4) |
|                                        | PMMoV-R | TTG TCG GTT GCA ATG CAA GT                        |    | 200 |     |
|                                        | PMMoV-P | FAM-CCT ACC GAA GCA AAT G-IABkFQ                  |    | 100 |     |
| Bovine coronavirus (BCoV) <sup>a</sup> | BCoV-F  | CTG GAA GTT GGT GGA GTT                           | 85 | 150 | (5) |
|                                        | BCoV-R  | ATT ATC GGC CTA ACA TAC ATC                       |    | 150 |     |
|                                        | BCoV-P  | FAM-CCT TCA TAT CTA TAC ACA TCA<br>AGT TGT T-BHQ1 |    | 50  |     |

14 <sup>a</sup> BCoV was directly spiked into the solid subsamples after collection and before viral RNA extraction; for the liquid subsamples,  
15 BCoV was spiked into the supernatant after centrifugation and before PEG precipitation. The quantity initially seeded into each batch  
16 of solid and liquid wastewater samples was ~800 genome copy/spike (Batch 1; 8/31/2020 to 9/2/2020,  $n = 6$ ), and later increased to  
17 higher levels to facilitate data analysis:  $1.3 \times 10^7$  genome copy/spike (Batch 2; 9/8/2020 to 9/14/2020,  $n = 12$ ), and  $3.7 \times 10^7$  genome  
18 copy/spike (Batch 3; 9/21/2020 to 9/28/2020,  $n = 14$ ), and  $2.5 \times 10^7$  genome copy/spike (Batch 4; 9/29/2020 to 10/4/2020,  $n = 14$ ).  
19 No significant difference in recovery was observed between the different spiking concentrations. Assessment of recovery based on  
20 the spiked BCoV showed that the averaged recovery ratios were 1.7% ( $\sigma = 1.7\%$ ) for the liquid subsamples ( $n = 46$ ) and 0.25% ( $\sigma =$   
21 0.36%) for solid subsamples ( $n = 46$ ).

23 **Table S2.** Thermal cycling conditions of qPCR assays and calibration curve information

| Target gene   | Temperature (°C) | Time   | Cycle | Calibration equation   | qPCR efficiency        | R <sup>2</sup> | Limit of quantification (GC/rxn) | Limit of detection (GC/rxn) |
|---------------|------------------|--------|-------|------------------------|------------------------|----------------|----------------------------------|-----------------------------|
| SARS-CoV-2 N1 | 95               | 2 min  | 1     | $y = -3.484x + 40.429$ | 93.8%                  | 0.991          | 10                               | 2.5                         |
|               | 95               | 3 sec  | 45    |                        |                        |                |                                  |                             |
| SARS-CoV-2 N2 | 55               | 30 sec |       | 45                     | $y = -3.420x + 38.228$ | 96.1%          | 0.999                            | 10                          |
|               | 95               | 3 min  | 45    |                        |                        |                |                                  |                             |
| SARS-CoV-2 E  | 95               | 15 sec |       | 45                     | $y = -3.403x + 37.882$ | 96.8%          | 0.999                            | 10                          |
|               | 58               | 30 sec |       |                        |                        |                |                                  |                             |
|               | 95               | 30 sec |       |                        |                        |                |                                  |                             |
| G2            | 95               | 2 min  | 1     | $y = -3.552x + 38.841$ | 91.4%                  | 0.994          | 10                               | 2.5                         |
|               | 95               | 15 sec | 45    |                        |                        |                |                                  |                             |
| G3            | 56               | 30 sec |       | 45                     | $y = -3.571x + 39.277$ | 90.6%          | 0.998                            | 10                          |
|               | 95               | 30 sec |       |                        |                        |                |                                  |                             |
| PMMoV         | 95               | 2 min  | 1     | $y = -3.238x + 38.075$ | 106.6%                 | 0.999          | 10                               | 2.5                         |
|               | 95               | 15 sec | 45    |                        |                        |                |                                  |                             |
|               | 53               | 30 sec |       |                        |                        |                |                                  |                             |
|               | 72               | 30 sec |       |                        |                        |                |                                  |                             |
| BCoV          | 95               | 2 min  | 1     | $y = -3.286x + 38.993$ | 102.0%                 | 0.998          | 10                               | 5                           |
|               | 95               | 15 sec | 45    |                        |                        |                |                                  |                             |
|               | 56               | 28 sec |       |                        |                        |                |                                  |                             |

25 **Table S3.** Slope, trend, and normality test results of before and after prewhitening of SARS-CoV-2 abundance (both raw and  
 26 normalized) from wastewater and daily clinical case numbers

| Sample                                  | Analysis                                        | Prewhitening | Average | Standard Deviation | Maximum value | Minimum value |
|-----------------------------------------|-------------------------------------------------|--------------|---------|--------------------|---------------|---------------|
| Honouliuli WWTP ( $n = 24$ )            | Slope                                           | Before       | -0.056  | 0.024              | -0.021        | -0.1          |
|                                         |                                                 | After        | 0.002   | 0.005              | 0.013         | -0.01         |
|                                         | Mann-Kendall trend test $p$ -value <sup>a</sup> | Before       | 0.013   | 0.034              | 0.137         | 0             |
|                                         |                                                 | After        | 0.809   | 0.159              | 1             | 0.435         |
|                                         | Shapiro-Wilk test $p$ -value <sup>b</sup>       | Before       | 0.101   | 0.104              | 0.445         | 0.002         |
|                                         |                                                 | After        | 0.443   | 0.252              | 0.963         | 0.093         |
| Sand Island WWTP ( $n = 24$ )           | Slope                                           | Before       | -0.055  | 0.02               | -0.014        | -0.1          |
|                                         |                                                 | After        | 0.003   | 0.005              | 0.011         | -0.007        |
|                                         | Mann-Kendall trend test $p$ -value              | Before       | 0       | 0.001              | 0.007         | 0             |
|                                         |                                                 | After        | 0.799   | 0.169              | 1             | 0.443         |
|                                         | Shapiro-Wilk test $p$ -value                    | Before       | 0.069   | 0.1                | 0.449         | 0.002         |
|                                         |                                                 | After        | 0.344   | 0.236              | 0.831         | 0.055         |
| Daily clinical case numbers ( $n = 1$ ) | Slope                                           | Before       | -       | -                  | -3.5081       |               |
|                                         |                                                 | After        | -       | -                  | 0.2655        |               |
|                                         | Mann-Kendall trend test $p$ -value              | Before       | -       | -                  | 0             |               |
|                                         |                                                 | After        | -       | -                  | 0.308         |               |
|                                         | Shapiro-Wilk test $p$ -value                    | Before       | -       | -                  | 0.002         |               |
|                                         |                                                 | After        | -       | -                  | 0.436         |               |

27 <sup>a</sup> The null hypothesis of Mann-Kendall trend test is that the data has no trend or serial correlation structure throughout the observed  
 28 time points.

29 <sup>b</sup> The null hypothesis of Shapiro-Wilk test is that the data is normally distributed.

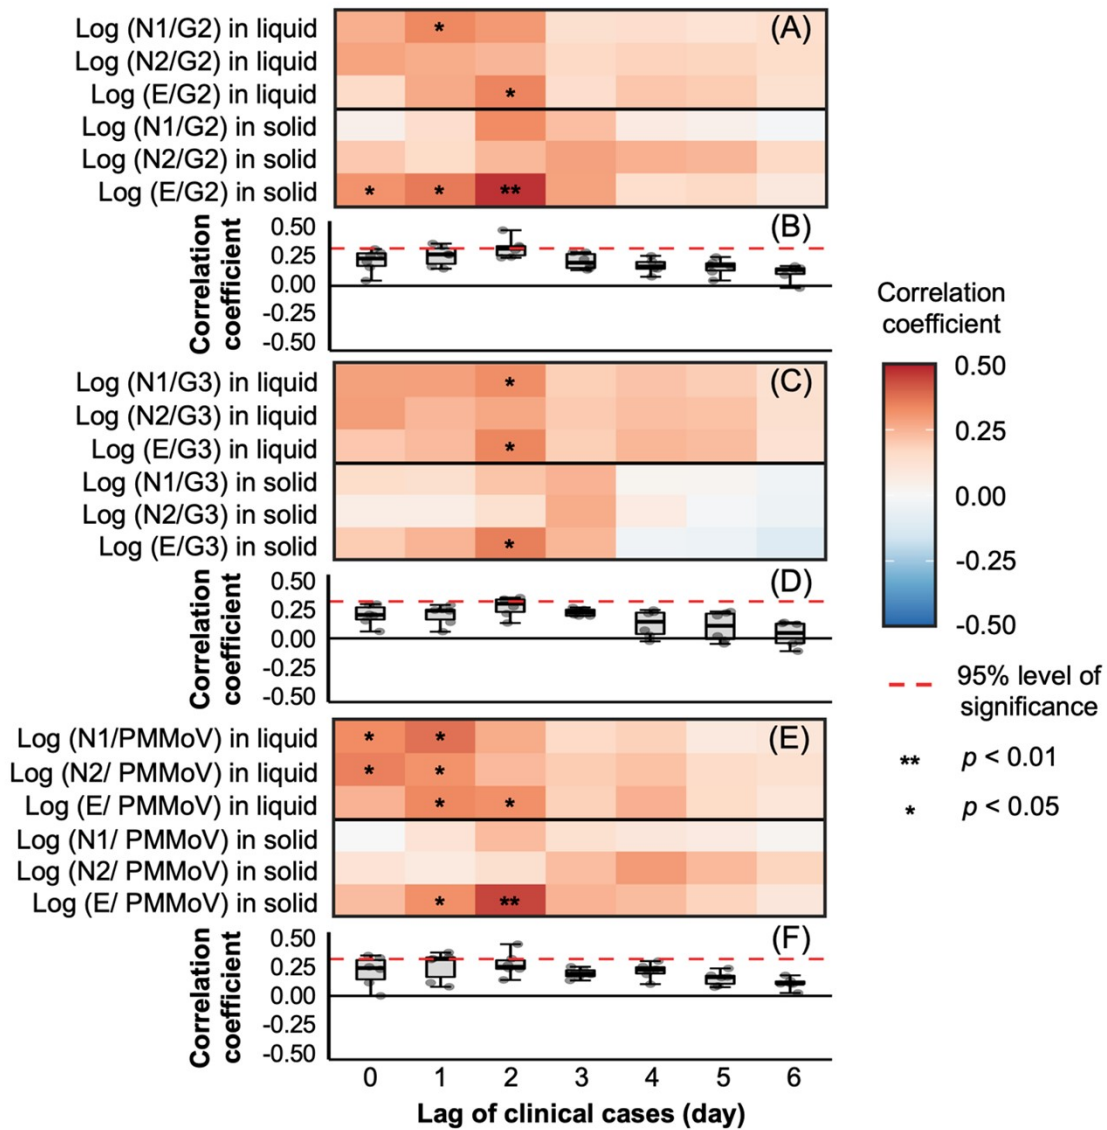

30

31 **Figure S1.** Cross-correlation between the non-prewhitened COVID-19 new case numbers and  
 32 the non-prewhitened SARS-CoV-2 RNA normalized abundance in wastewater samples from the  
 33 SI WWTP. The normalized abundance was calculated by dividing SARS-CoV-2 RNA  
 34 abundance by F+ RNA coliphage Group II (A, B), Group III (C, D), and PMMoV (E, F). All  
 35 normalized abundances were transformed into log forms. Red dashed lines represent a 95%  
 36 level of significance and the  $p$ -value of the correlation less than 0.05 are displayed as asterisks.  
 37 The middle, upper, and lower lines in the box of the boxplot represent the median, 25<sup>th</sup>, and 75<sup>th</sup>  
 38 percentiles, respectively, and the whiskers represent the largest and smallest values outside of  
 39 the interquartile range.

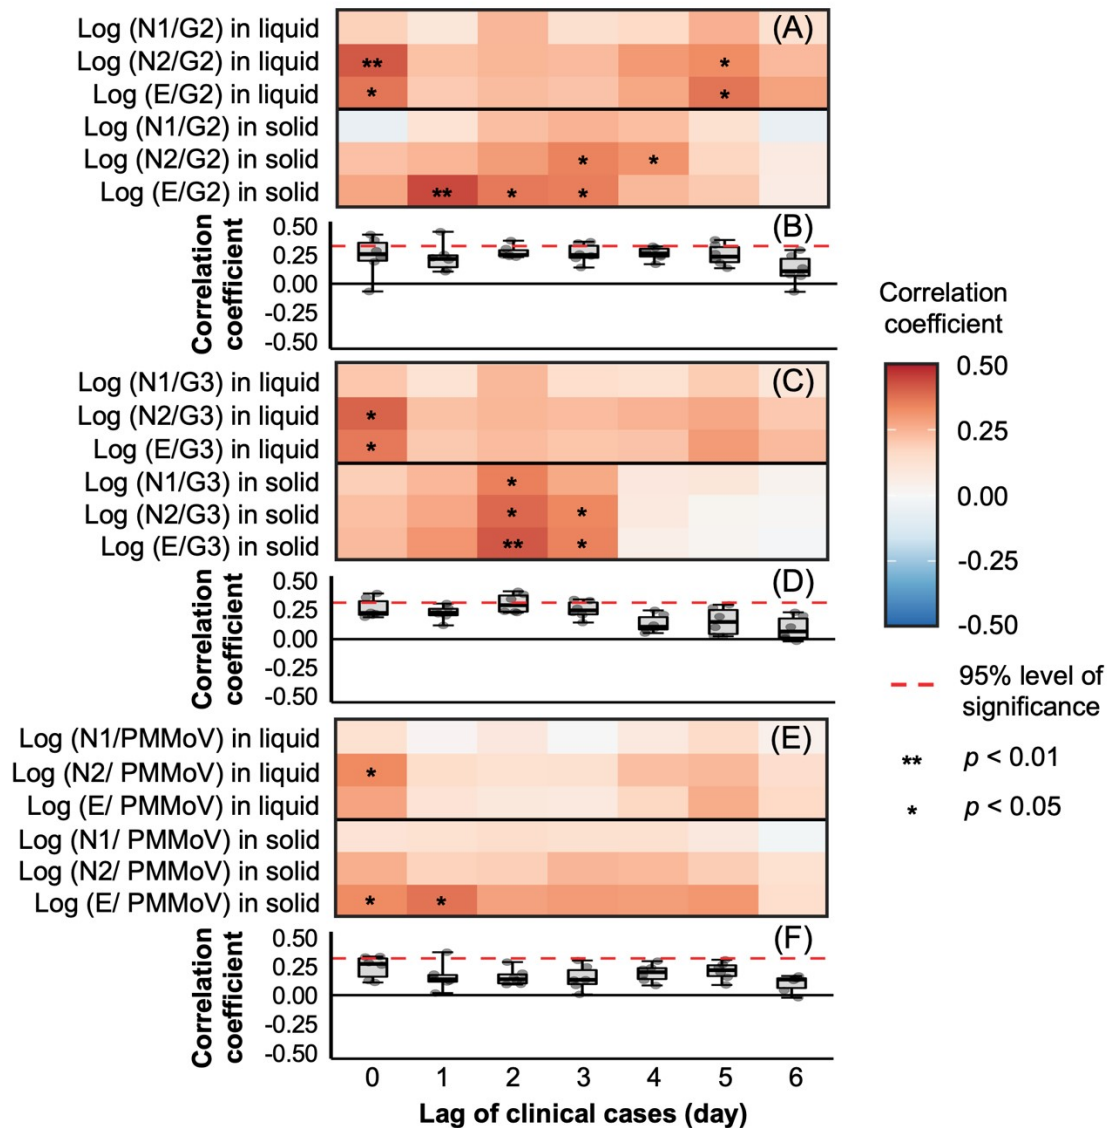

40

41 **Figure S2.** Cross-correlation between the non-prewhitened COVID-19 new case numbers and  
 42 the non-prewhitened SARS-CoV-2 RNA normalized abundance in wastewater samples from the  
 43 HO WWTP. The normalized abundance was calculated by dividing SARS-CoV-2 RNA  
 44 abundance by F+ RNA coliphage Group II (A, B), Group III (C, D), and PMMoV (E, F). All  
 45 normalized abundances were transformed into log forms. Red dashed lines represent a 95%  
 46 level of significance and the  $p$ -value of the correlation less than 0.05 are displayed as asterisks.  
 47 The middle, upper, and lower lines in the box of the boxplot represent the median, 25<sup>th</sup>, and 75<sup>th</sup>  
 48 percentiles, respectively, and the whiskers represent the largest and smallest values outside of  
 49 the interquartile range.

50

51 **References**

52

53 1. Lu X, Wang L, Sakthivel SK, Whitaker B, Murray J, Kamili S, et al. US CDC real-time  
54 reverse transcription PCR panel for detection of severe acute respiratory syndrome coronavirus  
55 2. *Emerging infectious diseases*. 2020;26(8):1654.

56 2. Corman VM, Landt O, Kaiser M, Molenkamp R, Meijer A, Chu DK, et al. Detection of  
57 2019 novel coronavirus (2019-nCoV) by real-time RT-PCR. *Eurosurveillance*.  
58 2020;25(3):2000045.

59 3. Friedman SD, Cooper EM, Calci KR, Genthner FJ. Design and assessment of a real time  
60 reverse transcription-PCR method to genotype single-stranded RNA male-specific coliphages  
61 (Family Leviviridae). *Journal of virological methods*. 2011;173(2):196-202.

62 4. Haramoto E, Kitajima M, Kishida N, Konno Y, Katayama H, Asami M, et al. Occurrence of  
63 pepper mild mottle virus in drinking water sources in Japan. *Applied and environmental*  
64 *microbiology*. 2013;79(23):7413-8.

65 5. Decaro N, Elia G, Campolo M, Desario C, Mari V, Radogna A, et al. Detection of bovine  
66 coronavirus using a TaqMan-based real-time RT-PCR assay. *Journal of virological methods*.  
67 2008;151(2):167-71.

68
